# Supplementary material for: Analisis Kualitas Layanan Di Pengangkutan PT. Agus Dengan Pendekatan Metode Servqual
Source: PeerJ journal article supplement (doi:10.7717/peerj.12466), 1999-11-01
Supplement: File_5.pdf [file File_5.pdf]

## Kwestionariusz statusu społeczno-ekonomicznego osób w wieku produkcyjnym

Szanowni Państwo, celem badania jest identyfikacja statusu społeczno-ekonomicznego osób w wieku produkcyjnym. Uzyskane wyniki zostaną poddane analizie statystycznej oraz w postaci zestawień zbiorczych posłużą wyłącznie celom naukowym. Bardzo dziękujemy za udział w badaniu i poświęcony czas.

1. Wiek:.....
2. Wysokość ciała [cm]:.....
3. Masa ciała [kg]:.....
4. Płeć:
  - Kobieta
  - Mężczyzna
5. Wykształcenie:
  - Podstawowe i zasadnicze zawodowe
  - Średnie
  - Wyższe
6. Status zawodowy:
  - Pracownik fizyczny
  - Pracownik Umysłowy
  - Przedsiębiorca
  - Student
  - Bezrobotny
  - Inny (jaki?) .....
7. Stan cywilny:
  - Panna i kawaler, wdowa i wdowiec, rozwiedziony i rozwiedziona, separowany i separowana, osoby pozostające w separacji prawnej i nie tworzące związku kohabitacyjnego z inną osobą oraz osoby pozostające w prawnym małżeństwie, lecz nie tworzące już wspólnoty małżeńskiej, a także nie będące w związku kohabitacyjnym z inną osobą
  - Żonaty i zamężna oraz partner i partnerka
8. Stały dochód:
  - Nie
  - Tak
9. Dochód brutto na osobę na miesiąc:
  - Do 130 USD
  - 131-260 USD
  - 261-390 USD
  - 391-520 USD
  - Powyżej 520 USD
10. Dochód netto do dyspozycji na osobę:
  - Brak
  - Do 52 USD
  - 53-104 USD
  - 105-156 USD
  - Powyżej 156 USD
11. Oszczędności:
  - Tak
  - Nie
12. Zadłużenie:
  - Tak
  - Nie
